# Supplementary material
Source: publisher site journal article supplement (https://zookeys.pensoft.net/article/87635/download/suppl/33/)
Supplement: Supplementary file

# TOPOGRAPHY OF A SCOPS-OWL

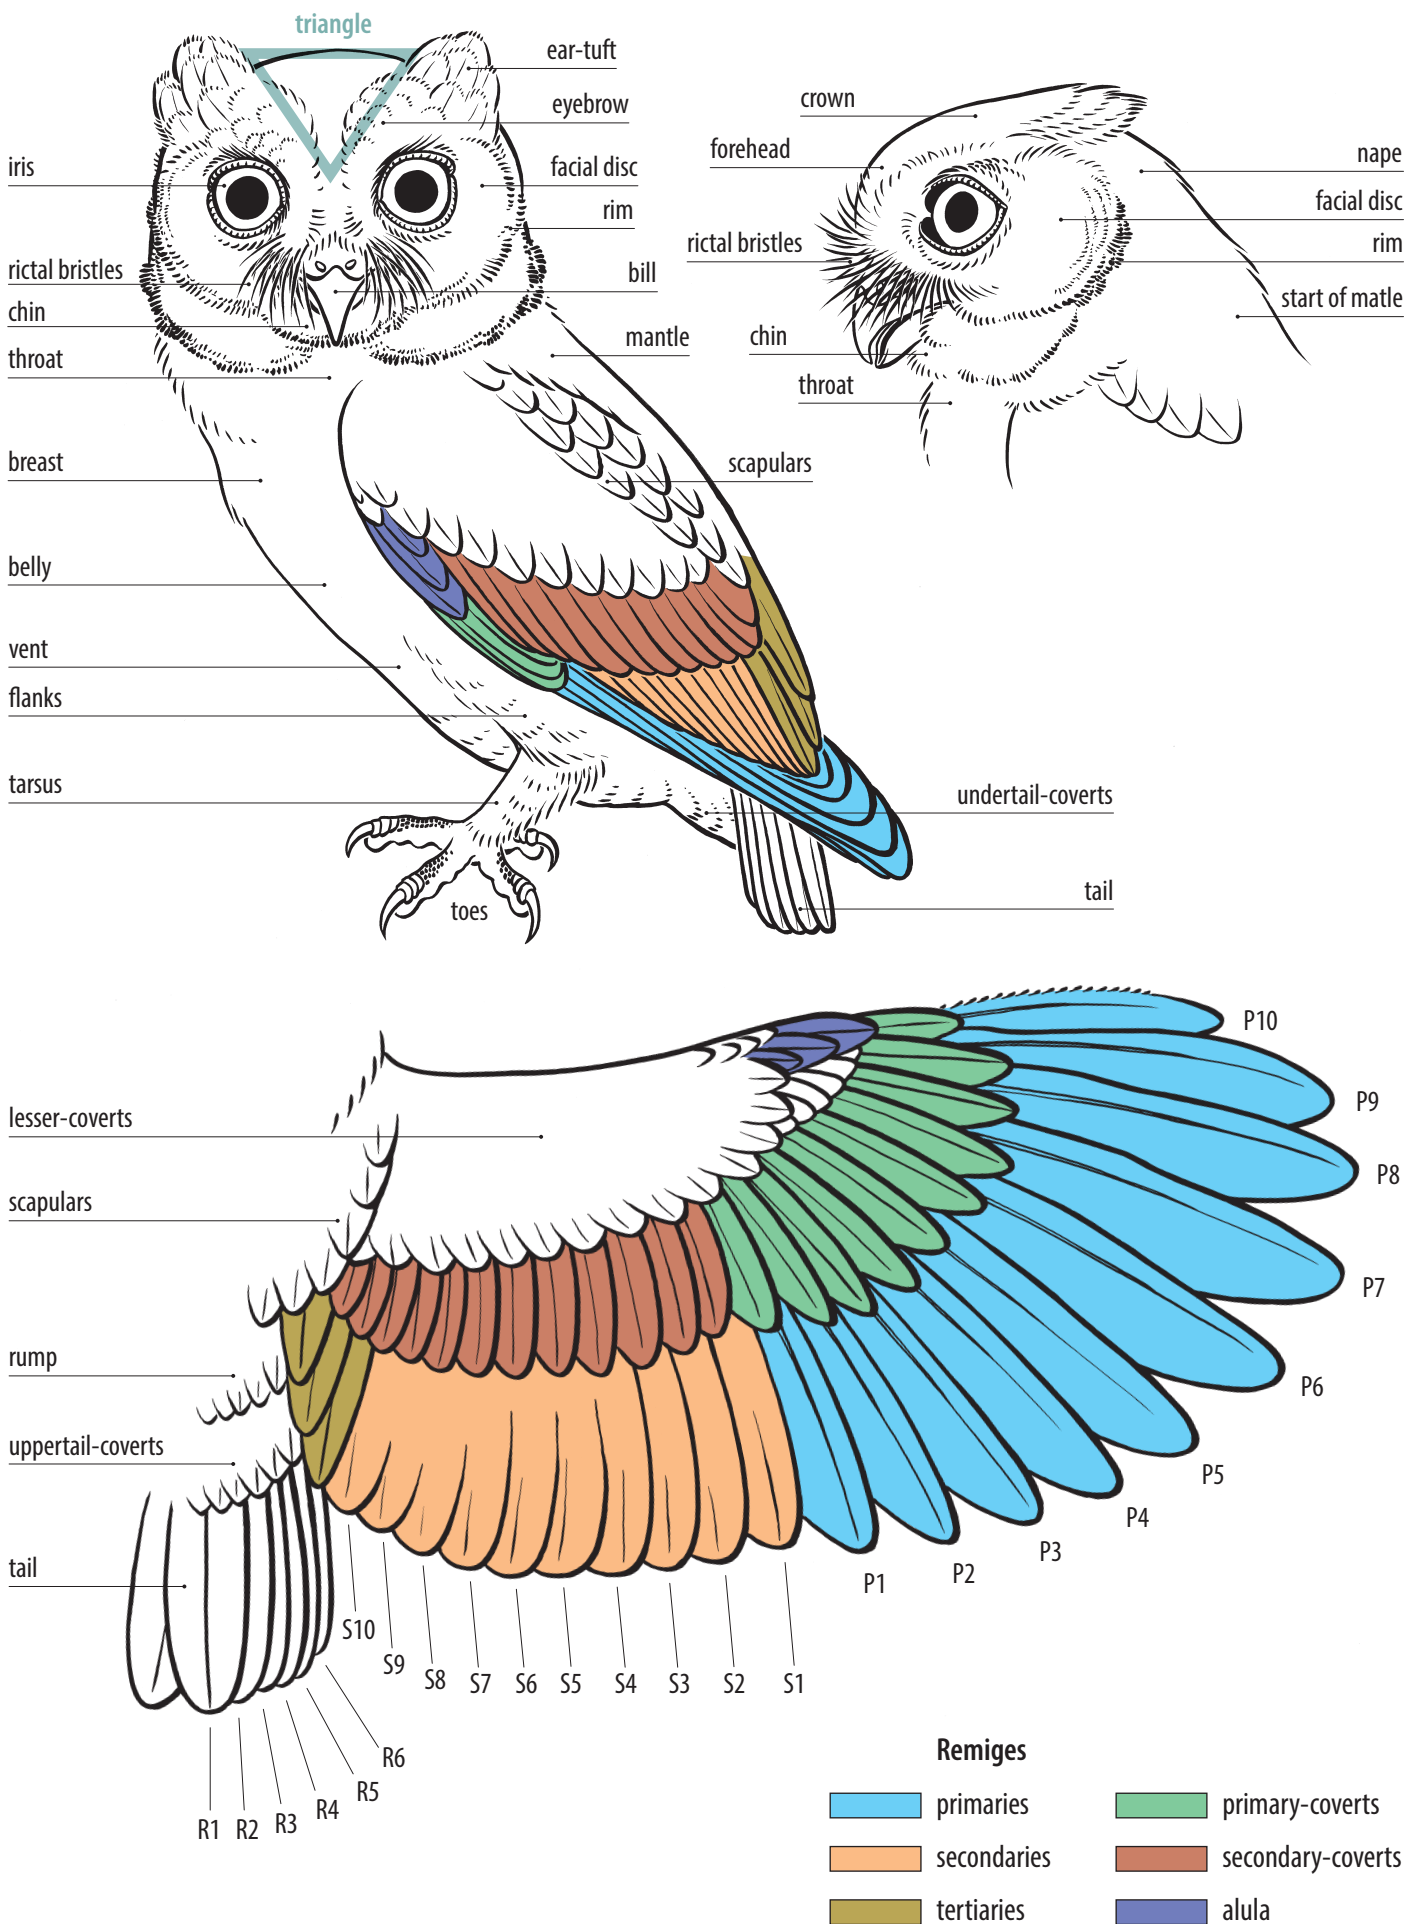

**Figure S1.** Topography of owls, with the terms used for the description and diagnosis of the Principe Scops-Owl *Otus bimegala* sp. nov. Illustration by MNC.
